# Supplementary material for: Insights into the global freshwater virome
Source: Front Microbiol. 2022 Sep 28;13:953500. doi: 10.3389/fmicb.2022.953500 (PMC9554406; doi:10.3389/fmicb.2022.953500)
Supplement: SUPPLEMENTARY TABLE S5 — Percent bases mapped to cellular sequences versus rRNA reads per 1000 reads. [file Table_5.xlsx]

## Sheet: Sheet1
	‰total rRNA	% total bases mapped to cellular sequences
ERR019477	0	16.8344
ERR019478	0	1.0334
ERR414817	0.002845	0.0256
ERR414818	0.010507	0.0932
ERR414819	0.126298	2.3403
ERR414820	0.012748	0.0481
ERR414821	0.014761	0.0525
ERR414822	0.017084	0.0141
ERR414823	0.001444	0.0145
ERR430570	0.007318	0.0013
SRR001047	0.043765	1.9054
SRR001075	0.033312	0.1144
SRR001076	0.097515	1.7615
SRR013515	0.025414	0.1742
SRR013516	0.061151	0.174
SRR013517	0.10857	0.1624
SRR013518	0.586826	6.2191
SRR013519	0.023673	6.2229
SRR013520	0	1.3015
SRR013521	0.140122	1.1733
SRR014584	0.013421	0.048
SRR014585	0.593575	2.6219
SRR014586	0.004526	0.0494
SRR014587	0.446696	18.0355
SRR014588	0.005432	0.1527
SRR014589	1.88529	12.3822
SRR100595	0.040182	0.015
SRR100596	0	0.0212
SRR107144	0.047966	0.0683
SRR107145	0.111324	0.259
SRR107146	0.077775	0.1574
SRR107147	0.038844	0.2531
SRR107148	0	0.1308
SRR107149	0.02644	0.0345
SRR1296481	3.64728	29.1426
SRR1301999	3.15192	20.6947
SRR1302010	3.87274	25.9064
SRR1302020	3.61434	37.0147
SRR1528659	0.164312	0.0256
SRR1528702	25.5124	17.2868
SRR1528703	1.50991	0.1399
SRR1528738	0.164855	0.0254
SRR1528740	25.4688	17.3395
SRR1528741	1.44816	0.1348
SRR1593033	325.979	32.9512
SRR1593049	578.96	59.8884
SRR1593258	341.42	35.1416
SRR1593259	72.6812	7.6651
SRR1593265	117.596	18.0357
SRR1593266	906.497	92.2248
SRR1593267	319.172	32.5779
SRR1593268	7.61193	1.0549
SRR1658890	0	0
SRR1658891	0	0
SRR1658894	0.427269	0.4955
SRR1658895	0.445529	0.5108
SRR1658897	0.077031	0.2398
SRR1658898	0.072805	0.245
SRR1659085	0.065335	0.0179
SRR1659086	0.065335	0.0179
SRR1659087	0.027573	0.029
SRR1659088	0.027573	0.029
SRR1659089	0	0.0043
SRR1659090	0	0.0043
SRR1659091	0.04764	0.0015
SRR1659092	0.04764	0.0015
SRR1659093	0	0.0017
SRR1659094	0	0.0017
SRR1659095	0.159412	1.2441
SRR1659096	0.159412	1.2441
SRR1915829	2.96496	53.8273
SRR1915851	3.07707	59.8255
SRR1974488	3.57455	55.4915
SRR1974489	3.61741	57.0415
SRR1974490	3.15786	46.9618
SRR1974491	2.59879	48.0992
SRR1974493	4.89932	42.1003
SRR1974494	3.68278	53.4773
SRR1974495	3.15791	48.0592
SRR1974496	3.15657	47.7407
SRR1974497	4.29052	37.4013
SRR1974498	3.0638	28.654
SRR1974499	3.28048	41.4584
SRR1974500	2.5743	47.6159
SRR1974501	3.76322	37.9297
SRR1974502	2.35512	31.936
SRR1974503	2.60559	28.7198
SRR1974504	2.77204	36.1131
SRR1974505	2.18622	34.4367
SRR1974506	3.08651	38.3672
SRR1974507	2.59425	35.5225
SRR1974508	3.01947	37.3215
SRR1974509	2.05375	28.6185
SRR1974510	2.55117	37.8617
SRR1974511	2.66874	37.8724
SRR1974512	2.42443	41.0893
SRR1974513	2.63419	43.8084
SRR1974514	2.43912	37.0733
SRR1974515	2.43912	37.0738
SRR1974516	2.20578	35.3782
SRR1974517	1.75864	14.526
SRR2083213	0.095182	0.8295
SRR2088917	0.143546	0.5296
SRR2088918	1.89903	0.204
SRR2088919	0.746219	0.2665
SRR2088920	0.146023	0.3198
SRR2088921	0.167975	0.2681
SRR2088922	0.595348	47.5198
SRR2088923	0.502568	0.4204
SRR2088924	0.062811	0.1781
SRR2088925	0.202062	0.4736
SRR2088927	0.193726	0.8322
SRR2088928	1.02923	0.8399
SRR2088930	1.34666	62.8492
SRR2088931	0.693241	0.2599
SRR2088932	0.139564	0.141
SRR2088934	1.81768	0.4678
SRR2088935	0.203403	1.08
SRR2088939	0.98688	0.6986
SRR2088940	0.103175	0.1803
SRR2088941	0.633446	1.0579
SRR2088942	0.776448	0.7853
SRR2088944	0.811647	0.7435
SRR2088945	0.541016	0.2468
SRR2088947	0.719432	0.7429
SRR2088948	0.04791	0.1551
SRR2088949	0.246413	0.4236
SRR2088950	1.16401	1.5186
SRR2088951	0.142082	0.1666
SRR2088952	0.249288	0.3722
SRR2088953	0.17494	0.1868
SRR2088955	0.350361	0.3554
SRR2088956	0.01866	0.1491
SRR2088957	0.075185	0.1695
SRR2088958	0.701019	0.2017
SRR2088959	0.138471	0.3282
SRR2088960	0.412858	0.4463
SRR2088961	0.092482	0.1407
SRR2088963	1.08661	0.6216
SRR2088964	0.039938	0.2239
SRR2088965	0.107222	0.224
SRR2088966	0.143635	0.1392
SRR2088967	0.16592	0.1292
SRR2088971	0.352848	0.1944
SRR2088972	0.063576	0.2021
SRR2088973	0.097649	0.17
SRR2088974	0.636672	0.1835
SRR2088975	0.199724	0.9247
SRR2088976	0.337702	0.6817
SRR2088977	0.096989	0.2463
SRR2088978	1.91037	51.4315
SRR2088979	0.83211	0.5253
SRR2088980	0.089086	0.2131
SRR2088988	0.356812	0.9753
SRR2088989	0.096062	0.2134
SRR2088990	0.738959	0.1466
SRR2088991	0.12412	0.6749
SRR2088992	0.352628	0.2471
SRR2088993	0.31527	0.3641
SRR2088994	0.188231	6.3874
SRR2088995	0.992002	0.4372
SRR2088996	0.081345	0.1925
SRR2088998	0.582525	0.5143
SRR2088999	0.087389	0.2945
SRR2089001	0.535113	0.3077
SRR2089003	0.328846	0.4212
SRR2089004	0.708277	0.3618
SRR2089005	0.290525	0.3094
SRR2089006	0.257672	0.2394
SRR2089007	0.493362	0.2614
SRR2089008	0.088823	0.1177
SRR2089009	0.233515	0.1627
SRR2089010	0.440607	0.1601
SRR2089012	0.694265	0.1531
SRR2089013	0.41967	0.8047
SRR2089014	0.208185	0.2644
SRR2089015	0.667829	0.1415
SRR2089016	0.038995	0.088
SRR2089017	0.310974	0.1495
SRR2089018	0.194565	0.134
SRR2089019	0.213781	8.0122
SRR2089020	0.289034	0.4738
SRR2089021	725.5	71.2969
SRR2089022	714.394	50.3813
SRR2089023	622.636	48.9695
SRR2089024	82.4648	8.1819
SRR2089025	43.8506	4.1843
SRR2089026	768.406	79.9361
SRR2089027	652.018	56.3274
SRR2089028	293.12	29.3143
SRR2089029	777.214	78.3847
SRR2089030	589.422	33.3135
SRR2089032	647.542	67.1883
SRR2089033	625.602	64.128
SRR2089034	904.622	91.4049
SRR2089035	846.717	67.9593
SRR2089036	193.21	18.1014
SRR2089037	749.335	72.838
SRR2089038	819.926	66.751
SRR2089039	674.042	60.3707
SRR2089040	18.3758	3.9454
SRR2089041	17.6493	3.934
SRR2089042	870.016	89.3529
SRR2089043	885.874	77.2964
SRR2089044	262.565	25.7747
SRR2089045	691.455	68.909
SRR2089046	452.864	44.7146
SRR2089047	16.3651	2.4998
SRR2089048	876.11	82.752
SRR2089049	178.978	18.3594
SRR2089050	256.26	26.2093
SRR2089051	866.115	80.9549
SRR2089052	260.272	26.4187
SRR2089053	882.534	88.6788
SRR2089054	878.829	90.1223
SRR2089055	28.3612	4.3846
SRR2089056	364.662	32.7951
SRR2089057	22.8692	3.1061
SRR2089058	877.348	85.1945
SRR2089059	861.471	69.1301
SRR2089060	113.306	11.0721
SRR2089061	478.054	47.0585
SRR2089062	788.97	52.3604
SRR2089063	18.2425	1.9134
SRR2089064	357.739	35.9997
SRR2089066	577.342	60.088
SRR2089067	884.64	67.3159
SRR2089068	46.002	3.9189
SRR2089069	406.473	39.3716
SRR2089070	472.196	36.089
SRR2089071	687.137	57.4686
SRR2089072	782.823	67.7097
SRR2089073	273.275	21.3568
SRR2089074	852.289	87.2087
SRR2089075	715.072	58.5242
SRR2089076	164.873	14.8228
SRR2089077	317.841	30.5436
SRR2089078	792.549	67.8079
SRR2089079	861.26	75.0256
SRR2089080	745.058	65.5746
SRR2089081	487.699	44.5602
SRR2089082	904.881	92.4806
SRR2089083	538.731	42.6908
SRR2089085	696.593	65.7968
SRR2089086	22.4084	1.8601
SRR2089087	24.0492	7.8919
SRR2089088	517.744	41.9299
SRR2089089	57.9372	5.5182
SRR2089090	882.862	93.4997
SRR2089091	63.3431	5.9441
SRR2089092	908.741	88.3292
SRR2089093	22.8251	2.9011
SRR2089094	306.747	20.7233
SRR2089095	826.441	73.934
SRR2089096	513.723	45.3455
SRR2089097	634.845	61.9249
SRR2089098	462.667	54.8216
SRR2089099	817.464	61.5446
SRR2089100	751.652	75.0711
SRR2089101	869.879	86.5029
SRR2089102	524.591	38.9203
SRR2089103	177.695	16.2778
SRR2089104	737.968	66.3015
SRR2089105	875.704	78.9631
SRR2089106	913.399	92.8205
SRR2089107	880.891	77.6907
SRR2089108	808.959	71.7632
SRR2089109	849.008	85.6837
SRR2089110	202.607	20.3684
SRR2089111	674.506	57.5948
SRR2089112	694.393	67.5121
SRR2089113	887.007	80.1153
SRR2089114	909.852	82.9978
SRR2089115	886.34	89.0647
SRR2089116	747.401	48.7932
SRR2089117	826.603	64.397
SRR2089118	614.634	76.6927
SRR2089119	814.378	73.6189
SRR2089120	921.871	84.1941
SRR2089121	193.09	15.4553
SRR2089122	812.069	62.4229
SRR2089123	415.747	41.4261
SRR2089124	891.066	88.4103
SRR2147000	0.003989	0.0314
SRR371573	0.598468	11.9303
SRR371574	0.355673	6.2567
SRR5192446	0.009614	0.1864
SRR5192447	0.010624	0.2687
SRR5192448	0.019672	0.3117
SRR5456989	0.12098	1.1642
SRR5457036	0.548296	10.9273
SRR5457061	0.66132	11.8186
SRR5457062	0.665833	12.0717
SRR5468101	0.002872	0.0847
SRR5468113	0.006032	0.085
SRR5468114	0.000944	0.1253
SRR5468115	0.001507	0.1459
SRR5468116	0.003194	0.0825
SRR5579951	0.653436	11.8964
SRR5579952	0.001419	0.1595
SRR5580653	0.002022	0.1156
SRR5580654	0.001321	0.1638
SRR5580656	0.341006	2.6348
SRR5580657	0.638423	9.9534
SRR5714877	0.001366	0.0581
SRR5995660	1.28615	3.943
SRR5995661	8.12962	0.8268
SRR5995662	11.2239	1.0217
SRR5995663	1.42671	2.8577
SRR5995664	1.00273	0.961
SRR5995665	1.23355	1.3014
SRR5995666	28.7077	4.0817
SRR5995667	9.77288	62.6739
SRR5995668	19.7168	7.0752
SRR5995669	699.719	71.7357
SRR5995670	10.7513	7.7594
SRR5995671	2.63281	1.2439
SRR5995672	7.50828	1.3878
SRR5995673	31.4691	5.0224
SRR5995674	43.2043	27.4914
SRR5995675	54.1163	6.9045
SRR5995676	76.2974	8.8668
SRR5995677	362.003	40.1729
SRR5995678	753.712	74.7967
SRR5995679	14.9414	0.9024
SRR5995680	31.5253	4.5827
SRR5995681	8.43906	4.5608
SRR5995682	33.0202	7.6211
SRR5995683	103.239	30.0591
SRR5995684	31.4968	9.7972
SRR5995685	314.799	29.3753
SRR5995686	166.243	21.4866
SRR5995687	28.2014	5.5845
SRR5995688	7.3619	3.8967
SRR5995689	84.0506	13.0982
SRR5995690	10.0925	5.0236
SRR5995691	9.96642	5.8007
SRR5995692	4.91322	1.5101
SRR5995693	9.84614	2.3309
SRR5995694	10.1182	2.8135
SRR5995695	15.5204	6.066
SRR5995696	1.68426	3.563
SRR5995697	26.74	7.2292
SRR648311	0.152909	3.5521
SRR648312	1.14026	26.0629
SRR648313	0.247951	8.8735
SRR648314	0.527469	10.109
